# Supplementary material for: A new compression strategy to reduce the size of nanopore sequencing data
Source: Genome Res. 2025 Jul;35(7):1574–82. doi: 10.1101/gr.280090.124 (PMC12212073; doi:10.1101/gr.280090.124)
Supplement: Supplement 2 [file Supplemental_Table_S5.xlsx]

## Sheet: OutlierReadAnalysis
Outliers in read-to-reference identity scores for the dataset HG002 chr22 R10.4.1 5KHz - dorado 0.3.4 SUP basecalling
Reads where read:ref identity was lower in 8-bit data vs original 11-bit by >10%
read ID	QUERY_LEN_orig	QUERY_LEN 8 bit	TARGET_orig	TARGET 8 bit	ALLIGN_LEN_orig	ALLIGN_LEN 8 bit	MAPQ_orig	MAPQ 8 bit	read-to-read identity score	read-to-ref original	read-to-ref 8 bit
03dfe454-4732-447a-9b43-37c2984cd480	11007	11005	chrUn_KI270442v1:294184-300821	chr22:11328315-11340250	6716	12030	0	1	0.996006	0.910959	0.507648
0cc32919-a81d-46a5-959b-538ccd70ef04	2662	2662	chr22:18894144-18896639	chr21:10270134-10272182	2697	2636	0	1	0.999249	0.779014	0.677162
0f3b37b6-2462-4ed8-a337-cbabc2cc3d42	2572	2572	chr13:18211700-18212572	chr22:18205220-18207449	877	2444	45	1	0.998445	0.898518	0.765548
0f7bac67-6f5a-4078-a624-9e0043c8eb44	20397	20408	chr22:11211032-11215498	chr22:11211032-11215498	5723	6830	1	1	0.994363	0.651057	0.546559
13470535-49c6-4565-b79c-de752c07ae06	22772	22771	chr22:11211025-11215502	chr22:11211128-11215503	4900	5696	60	60	0.998727	0.782041	0.660463
1416ddf1-3bba-4b33-ba4b-acf27cafab80	410	409	chr11:106173837-106173950	chr22:17454359-17454929	116	570	18	1	0.997561	0.931034	0.570175
179fdaf0-2623-4af2-a6b7-0ad63af138cb	1442	1438	chr22:42323834-42324894	chr22:42323844-42324894	1137	1381	60	60	0.996533	0.908531	0.754526
27cde507-046d-4144-9ce7-507cfbbf0db1	12945	12948	chrY:56713876-56716823	chrY:56713168-56716826	3013	3694	1	1	0.972195	0.85297	0.714943
2a1f40e7-38be-46d1-b748-e0085dca3565	6963	6961	chr22:11211034-11215498	chr22:11211032-11215486	5202	6123	1	1	0.998708	0.713379	0.606892
2ababa32-3c64-4246-b100-48a3d3e0424e	1366	1361	chr13:18211700-18212231	chr22:18892694-18893829	536	1269	58	0	0.988313	0.876866	0.756501
2f24bb54-8c7f-4ae7-bf37-d24035e6ff7c	13072	13089	chr22:18890485-18896999	chr13:18211700-18215461	8086	5607	43	1	0.984772	0.685877	0.580881
2fc71bfc-3e55-43a4-87a5-986ae2913756	13735	13726	chrUn_KI270584v1:0-3703	chr22:12334272-12348754	3742	14744	60	1	0.982959	0.959914	0.601736
2fc72e70-6f79-4ddc-9539-fa95714fdfc5	29029	29027	chr22:11211026-11215498	chr22:11211038-11215498	5348	6691	1	2	0.99938	0.696896	0.560454
34b63eee-7517-4188-b7c1-7aadd3da3110	3357	3359	chr22:18422080-18425487	chr22:18733787-18736542	3423	3322	1	1	0.996723	0.946246	0.813666
36d33767-c661-4b5f-934b-65d5722e59bc	333	329	chr22:21327712-21327982	chr22:18728419-18728788	295	376	1	1	0.993671	0.847458	0.694149
377240c8-6d4d-49d4-9304-c1749987a496	16174	16178	chr22:11211032-11215496	chr22:11211032-11215486	5405	6802	11	60	0.998331	0.687142	0.54925
381fec44-9210-4859-8dc9-fd1fdfa3b8db	1639	1637	chr5:95650927-95651334	chr22:18895238-18896489	409	1316	60	1	0.992692	0.99022	0.75152
39cd1b84-1a17-42aa-b6d8-e73912c9182c	493	491	chr22_KI270734v1_random:121518-121704	chr22:18238170-18238621	186	473	0	1	0.997947	0.930108	0.778013
3ad97cab-b74d-4a09-bb03-33afefa37aac	12582	12581	chr4:49709070-49711961	chr4:49709070-49711957	4223	5274	11	1	0.996258	0.608099	0.491278
3c39bac9-3165-41c3-bba0-bc30cf2f8b58	8898	8909	chr22:18417316-18421872	chr22:18890485-18895619	4834	6676	1	10	0.990705	0.759206	0.653685
402bf847-1c73-4561-a348-304ff4f180ec	511	517	chr13:113672389-113672557	chr9:96157605-96158064	174	488	10	1	0.981891	0.908046	0.760246
4108288d-6f2f-40a2-a7e8-97900834603c	9776	9776	chr22:11211034-11215498	chr22:11211034-11215493	5519	6475	7	60	0.999078	0.675666	0.575135
433705ed-03d5-43e0-8119-02992e6d69a3	8382	8384	chr5:139188092-139190419	chr22:11211034-11215498	2400	5432	60	7	0.984929	0.9225	0.670103
4c9086e4-a4bc-40b2-8461-4e2295050fc0	1269	1266	chr22:34726106-34726648	chr5:49601530-49602505	545	983	60	1	0.981975	0.922936	0.649034
503882d8-3ce1-4d68-aa37-0ed01f556568	1109	1102	chr22:38478041-38478602	chr6:57190874-57191739	571	889	60	60	0.965116	0.93345	0.823397
507e614a-5141-4ba9-be6a-d357c7fac0ff	13033	12945	chr22:11211033-11215498	chr22:11211032-11215498	5341	6694	1	1	0.98186	0.694252	0.555572
51fa0a7b-66c0-4d12-9a7e-a56fc1315ec3	13077	13073	chr22:12333670-12340264	chr22:12519585-12531102	6616	11565	16	25	0.997784	0.888906	0.509987
57b56a3c-17cf-4e9f-981a-75662f70e11f	409	413	chr3:112234727-112234857	chr22:21085572-21085819	130	253	52	60	0.975787	1	0.853755
5e5b4dbe-3ceb-45fc-ba35-5465b76f5e91	7681	7680	chr22:11211034-11215486	chr22:11211032-11215498	4823	5652	1	29	0.999219	0.759486	0.654459
615bc0a3-71c8-41d6-8988-f16ef64f77e7	4714	4710	chr22:11211032-11215496	chr4:49709070-49711931	4723	3995	1	1	0.994278	0.773449	0.620275
63ef22f8-28bd-41c0-b784-9f07f9e1b28a	15130	15123	chr10:40387687-40401796	chr10:40594201-40612712	15157	18543	1	6	0.99716	0.880979	0.769455
6af45a6b-cfe5-4922-b04c-d1a011f25824	5122	5123	chr22:11211032-11215486	chrUn_KI270467v1:668-3918	4789	4353	1	1	0.997268	0.761954	0.638181
76b9745e-b141-4707-ac9e-a5134ce76ce6	5642	5640	chr22:11211033-11215486	chrUn_KI270467v1:659-3912	5240	5245	1	0	0.997696	0.689504	0.535748
77e4074c-b959-4b39-85e4-42ca5f2570e2	4761	4773	chr22:11211034-11215486	chrUn_KI270467v1:673-3918	4685	4634	36	1	0.994554	0.777588	0.597324
7871b203-a3eb-4b72-a4f6-3f775334d8b6	7988	7980	chr21:10360053-10361876	chr22_KI270734v1_random:118524-122262	1827	4119	39	12	0.996496	0.970443	0.785142
78f0a68d-c12e-48c7-a834-dced24e55a24	14442	14385	chr4:49709070-49711961	chr4:49709070-49711961	4155	5014	18	18	0.98756	0.638748	0.532908
7988070e-3f71-4cbc-bc3b-fde169073113	2145	2142	chr22:18203227-18205272	chr22:18730913-18734005	2154	3140	1	1	0.973173	0.794336	0.608917
8173f784-0dcf-49fc-b731-5705f8fa6fef	14257	14262	chrUn_KI270756v1:65-7665	chrUn_KI270756v1:65-10670	8130	11149	59	56	0.997827	0.753875	0.569378
81ba8e7f-96cc-4030-9c7e-781a5a3fc325	10760	10763	chr22:12488690-12497953	chr22:12366203-12376745	9282	11242	20	1	0.997215	0.991273	0.884718
844a0144-91fd-416a-94e8-1817d48b43d5	943	945	chr22:49155766-49156433	chr22:49155772-49156433	780	899	60	60	0.9926	0.801282	0.700779
863cca05-de17-486b-9daa-23fa9723d018	2475	2475	chr13:18211700-18212568	chr22:18386852-18388960	881	2309	7	6	0.991522	0.879682	0.764833
870b2217-a402-43c9-b5a5-ee93fa9268f8	6362	6356	chr22:11211034-11215498	chr22:11211032-11215498	5105	5989	1	1	0.997171	0.721645	0.617465
8bcee996-70ae-419e-9846-d1062638f179	9451	9471	chr22:18417341-18421872	chr22:18890485-18895597	4817	6446	4	1	0.982663	0.761055	0.652653
9964b545-0655-4fca-8050-d9ea4f6acc84	591	591	chr22:50643620-50644175	chr22:50643620-50644261	562	647	60	60	0.971429	0.886121	0.774343
9d77e4f4-d589-4594-ab47-3e87ba33a090	384	388	chr22:21166515-21166596	chr22_KI270734v1_random:121270-121614	81	350	2	1	0.994751	0.938272	0.828571
a0ffcef1-771b-4d73-ab5c-4d85996fec8c	2269	2270	chr13:18211700-18212551	chr22:21326163-21327944	851	1932	23	1	0.995158	0.895417	0.770704
ada68078-42ba-4468-a87d-bbb6ca7e7af9	18965	18956	chr22:11119187-11137945	chrY:11387719-11409367	18990	21714	1	1	0.997576	0.952923	0.842406
b060873c-57bb-40df-82a9-eab3a99fa06a	10392	10399	chr22:11211032-11215498	chr14:16091801-16096528	5121	6432	1	1	0.984214	0.71529	0.592506
b5568fdf-ff2b-47e5-97ac-146ee36f82fe	7252	7250	chr22:30851879-30855255	chr22:30851879-30857937	3397	6171	60	60	0.981768	0.96438	0.838114
ba9382d4-89dd-469e-b605-73d3a64d8664	11388	11376	chr21:10269871-10274327	chr13:18211700-18215441	5278	5574	20	23	0.989306	0.70936	0.590779
bb3030fc-754e-42f6-8288-b0d05ce1b694	7939	7901	chr21:10269871-10273788	chr13:18211710-18214806	4579	4357	1	2	0.976674	0.706486	0.598347
bb592791-be82-4dcc-ae95-4d15135a14c9	27957	27934	chr10:132001512-132002032	chr6:118591193-118591837	536	649	1	1	0.991646	0.833955	0.711864
be484c4e-141a-4598-a3b9-945178476079	6834	6846	chr14:16091801-16096528	chrUn_KI270467v1:659-3864	5968	5392	1	1	0.996348	0.655664	0.514651
bf176b4b-2983-445e-82fb-ece33498a3f2	572	574	chr22:35396487-35396843	chr22:35396312-35396843	357	547	60	60	0.991304	0.991597	0.884826
c02de088-0f9e-4de5-bc4d-6be44847328f	2931	2929	chr22:22398237-22398733	chr22:22323270-22324185	497	930	60	1	0.994889	0.987928	0.822581
c0ebcf93-b73f-450b-82ce-c271863c75b0	1956	1954	chr13:18211700-18212563	chr22:18386852-18388664	868	1883	25	1	0.998466	0.894009	0.7812
c2171623-3be2-46c0-8746-e775da64ef82	7963	7956	chr9:105375878-105377604	chr21:10269871-10274327	1738	5235	60	1	0.996861	0.981588	0.716523
c447ed3c-f651-49cc-a3f8-60d32d024083	9313	9226	chr13:17919167-17929121	chr13:17718453-17731472	10127	13147	7	26	0.989127	0.850992	0.658781
c96bfa3a-7734-47af-a41f-003d0a2d2208	397	399	chr22:17616466-17616766	chr22:17616466-17617121	307	663	10	7	0.982544	0.921824	0.494721
cb0580dc-16c1-4d1c-b13f-88a0274fc305	4819	4817	chr22:11211033-11215498	chrUn_KI270467v1:659-3918	4609	4222	34	1	0.99834	0.785203	0.66343
cb2fb173-7274-442b-82c9-cc5aaaa5e233	7688	7686	chr22:11211034-11215486	chr22:11211032-11215498	4948	5981	1	1	0.997781	0.742118	0.617957
d1709883-a2da-42df-9eee-fc27179a63d0	7043	7043	chr22:16892180-16897942	chr22:16892180-16906338	5797	14210	2	41	0.992637	0.952734	0.474666
d5222feb-00d1-42f1-ba0f-375dffbec02f	9956	9951	chr22:11211033-11215496	chr22:11211038-11215486	5069	6565	1	1	0.995979	0.728941	0.566489
d94222fa-c45c-4749-8705-4a5ec45cc9ab	8448	8448	chr22:11211034-11215498	chr22:11211034-11215498	4740	5698	60	7	0.999172	0.774473	0.653036
dccae9d4-3005-42ad-a19f-123014ebc8b3	2039	2037	chr13:18211700-18212406	chr22:18235558-18237456	707	2054	17	1	0.997548	0.893918	0.771665
deaa67cd-20ec-4e51-8589-48ba1e3ea4d1	4941	4943	chr22:11211032-11215486	chrUn_KI270467v1:672-3904	4875	4487	6	1	0.999595	0.742564	0.617339
e1cedf25-0995-4279-849d-dc4dabb5104f	1437	1437	chr13:18211700-18212420	chr22:18205415-18206721	720	1412	36	1	0.995825	0.906944	0.798867
e1f6cb4f-afc1-4ee6-b808-38e75e362f4e	340	333	chr22:24529539-24529769	chr22:24529385-24529769	236	387	60	60	0.949704	0.919492	0.736434
e433ffc3-396c-4956-b1b3-8f2bd4733cc8	5355	5360	chr22:11211032-11215497	chr4:49709070-49711961	5011	4365	1	1	0.998507	0.731591	0.575258
e5d7e7b6-0ba1-4274-a9d0-83dcd79c71ac	5123	5114	chr22:18890485-18893794	chr13:18211700-18214078	3816	3561	1	1	0.991981	0.75	0.584948
e6accd90-1d91-4e6f-9ef6-8e40121a91af	7889	7888	chrUn_KI270438v1:104254-112502	chrUn_KI270438v1:102357-112502	8861	10790	60	48	0.999113	0.735809	0.603892
e73856cd-7ecc-4072-a297-451c88d96d79	13033	13033	chr22:11211032-11215486	chr22:11211032-11215498	5670	6754	18	1	0.998849	0.652205	0.550637
e77db7ec-7d4c-41b4-a31f-9d772ea3aa18	2196	2197	chr13:18211700-18212504	chr21:10270663-10272446	814	1900	55	1	0.990847	0.873464	0.756842
ea0ddfd4-30bb-412f-aefa-5b0549d76508	1489	1492	chr13:18211700-18212275	chr22:21326320-21327669	575	1481	52	1	0.996642	0.906087	0.767049
f21b6f74-0e28-4c11-8bdb-004d367ca1db	31589	31597	chr22:11211032-11215498	chr22:11211032-11215498	5506	6777	1	9	0.999494	0.673629	0.553637
f5bba5e4-ad0a-4a25-bb05-7ba455aec23d	1263	1261	chr13:18211700-18212171	chr21:10270946-10272107	474	1270	0	1	0.977165	0.881857	0.761417
f94abcd3-3c92-4c6d-b9e6-5d2258da613b	4104	4100	chr13:18212567-18214632	chr13:18213450-18215461	2196	2667	1	1	0.997077	0.775046	0.662917
fa63bb4e-6362-4521-bd56-cd2042d08f38	1309	1309	chr22:48678884-48679839	chr22:48678816-48679839	1029	1329	60	60	0.998473	0.8931	0.749436
fd3e629b-3c20-4e9c-895c-06d1f771580a	3327	3322	chr22:43496352-43499704	chr22:43495929-43499704	3367	3781	60	60	0.998497	0.961984	0.858768
Reads where read:ref identity was higher in 8-bit data vs original 11-bit by >10%
read ID	QUERY_LEN_orig	QUERY_LEN 8 bit	TARGET_orig	TARGET 8 bit	ALLIGN_LEN_orig	ALLIGN_LEN 8 bit	MAPQ_orig	MAPQ 8 bit	read-to-read identity score	read-to-ref original	read-to-ref 8 bit
084421d6-2315-4089-983b-2baf0b18865d	5259	5261	chrUn_KI270467v1:672-3918	chr22:11211032-11215442	4635	5192	1	56	0.99848	0.602373	0.704353
10f93072-fe8d-446d-866c-369bb318aaeb	19769	19743	chr13:18211702-18215461	chr22:18417183-18421872	5600	4975	1	1	0.967936	0.58625	0.761608
16f245a3-8a43-47a9-8a9f-c3e7db88ed5f	400	402	chr20:29098185-29098772	chr22:12622282-12622645	588	363	1	1	0.974874	0.568027	0.911846
192034d1-7879-438d-8495-24afbe86aa5a	11266	11286	chr22:11211032-11215486	chr22:11211032-11215503	6859	5557	1	6	0.992044	0.54177	0.670146
1b28f74a-1259-4831-9f4f-1ba635974baa	314	313	chr1:143272606-143272868	chr22_KI270737v1_random:7463-7727	275	266	1	0	0.996815	0.756364	0.860902
20c6d864-e16c-4624-8ab0-408c1cf0599a	1612	1612	chr14:19012855-19014175	chr14:19013164-19014172	1367	1012	3	4	0.983961	0.873446	0.977273
211bf3d7-208e-4a46-a422-5758ccced44c	1653	1657	chr2:93923434-93924552	chr2:92362949-92363902	1121	954	5	1	0.989734	0.816236	0.972746
22858d6f-ad77-45a4-85e7-3997bd5ff839	248	248	chr22:11215234-11215450	chr8:43237687-43237888	216	207	1	1	0.972	0.726852	0.830918
22f50bcc-f2f7-4457-91fc-69467d1e8abb	842	840	chr22:50643598-50644279	chr22:50643587-50644316	796	732	60	60	0.990232	0.810302	0.923497
29b99c1b-abd3-4e4f-893f-cda768b1cd2f	2292	2285	chr22:50773433-50774795	chr6:43190872-43191856	1381	986	32	60	0.98128	0.867487	0.98783
30121808-f44a-420c-a1e4-a914127dba5c	543	544	chr16:24384298-24384770	chr22:46345075-46345398	478	325	11	1	0.990741	0.889121	0.990769
30b401b7-f350-46ce-8f98-64e9f03377b9	8800	8797	chr22:21125735-21133585	chr22:21125789-21133584	8817	7831	22	22	0.994554	0.876035	0.977781
350ecc9d-d383-47d8-961c-fef271bb2781	5382	5382	chr20:31059917-31063926	chr22:23326402-23327856	4120	1454	1	8	0.999628	0.729854	0.986245
35eda88b-e8d2-475b-9248-c54efff43d83	8912	8911	chr22:11211034-11215486	chr22:11211034-11215498	5808	4967	1	1	0.99899	0.639807	0.744715
3646e537-2d74-4dd8-bf71-265fa21c302a	5142	5131	chr13:18211719-18214815	chr22:18893218-18896969	4462	4073	1	1	0.980788	0.595249	0.772404
38a8e909-d84b-4275-bed6-d46c806fb688	8718	8727	chr13:18211700-18215459	chr21:10269871-10274327	5623	5240	1	19	0.993823	0.586164	0.716985
3eef9b17-d2d6-49b8-95e1-f743ab339022	20703	20696	chr22:11211038-11215496	chr22:11211034-11215497	6205	5261	8	5	0.999227	0.600161	0.704619
3f969bd9-7741-4102-8792-afafe115e68c	4448	4446	chr4:49709101-49711961	chr22:11211032-11215497	4274	4509	10	26	0.999101	0.579785	0.758927
4d3de10f-c6a1-4884-845e-c80ed289537f	3786	3801	chr20:30880738-30882881	chr22:11595172-11596943	2158	1788	21	1	0.995001	0.762743	0.904922
500e85d7-265a-4b6a-a8b3-ed05801742d7	1123	1132	chr22:49385753-49387049	chr22:49385962-49387049	1309	1115	58	60	0.986655	0.798319	0.926457
5010a349-a971-4d4a-b1aa-ab1f9c5c4399	2211	2206	chr22:18386856-18388779	chr13:18211700-18212565	2120	871	1	29	0.98603	0.765094	0.880597
51a5e8dd-8b6d-4bea-a898-4761a5619f87	33976	33967	chr4:50433605-50461947	chr4:50346596-50370990	28377	24439	1	1	0.988818	0.734961	0.850444
5376d9a0-f584-4390-b0ae-65a026b7f35b	5497	5507	chrUn_KI270467v1:659-3918	chr22:11211032-11215497	4791	5285	0	0	0.999818	0.586934	0.704447
56819aad-5bef-46f2-8970-6c9c6130a385	7105	7089	chr22:18893217-18896986	chrY:56716233-56717575	4042	1343	60	1	0.979738	0.769421	0.98213
587d1cb6-7858-413b-8776-75668a5c00c0	1876	1880	chr22:18203262-18204770	chr2:105048872-105049303	1581	431	1	60	0.989396	0.731815	0.981439
59294161-18c5-4935-9f49-a6bcda26fca5	4439	4440	chr21:10270361-10274101	chr22:18894547-18896990	4657	2644	6	1	0.998649	0.660941	0.773071
5fa50fba-007f-4952-a0c4-9eabcd33acad	1682	1670	chr22:21326163-21327621	chr13:18211721-18212476	1558	757	1	23	0.978584	0.788832	0.899604
66bc6683-ad96-4d76-a29f-506d98694dfb	1983	1982	chr22:18732902-18734258	chr13:18211700-18212267	1436	570	1	37	0.995457	0.762535	0.896491
66e2d3e4-772b-4ebe-972f-f5fcb6f3a66f	772	773	chr22:43834519-43835535	chr22:43834743-43835535	1020	795	60	60	0.993532	0.65	0.821384
760f6249-f320-41ee-9d9b-7ee827a4b755	5474	5476	chrUn_KI270467v1:659-3919	chr22:11211033-11215498	4759	4724	1	1	0.998539	0.588569	0.77392
76e02a85-f213-4ee1-8c9c-ba05bd6de090	14376	14372	chr22:11211033-11215498	chr22:11211033-11215505	7046	5770	2	1	0.996942	0.528669	0.643328
78fc9eab-d4a4-4116-879c-6e56ebc19380	25269	25260	chr9:64940181-64960067	chr18:15402020-15410899	22062	8898	1	60	0.996638	0.760538	0.993931
7ae3e75a-8332-42af-a75c-573948b98d0f	24373	24364	chr1:143191864-143228277	chr1:143214824-143242744	36475	27944	0	0	0.998892	0.533845	0.697932
7cdd0b16-4990-46e8-b7e8-80defd24774e	53508	53502	chr8:43237602-43242374	chr22:11211034-11215498	7174	5373	28	1	0.999607	0.555618	0.692165
7f547490-57ce-4db3-be41-5372bf11673d	4207	4211	chr13:18211705-18213898	chr22:18890485-18893827	3364	3926	1	1	0.992656	0.573424	0.734335
833891b1-6109-4748-b9c7-13e10ab9bd0a	2154	2151	chr22:50643625-50644316	chr22:50643620-50644290	1090	882	14	60	0.995824	0.610092	0.732426
83627815-5dca-4291-8f35-196826f00852	22973	22992	chr22:11326674-11346064	chr20:30831834-30845763	19840	14557	1	1	0.996434	0.664516	0.898125
856b6a23-e422-41b8-aa82-f555d850b0c1	404	407	chr22:43339566-43339879	chr22:43339659-43340011	364	358	41	47	0.987562	0.769231	0.907821
88832f69-c682-4938-91ca-a6030ac8b462	4923	4924	chrUn_KI270467v1:659-3917	chr22:11211127-11215498	4410	4915	1	9	0.997965	0.63288	0.733876
8a9e4177-fa38-4ce7-9809-1c9fcaecce11	12160	12164	chr4:49709070-49711961	chr4:49709070-49711961	5355	4145	5	53	0.997699	0.502708	0.644632
8b1a5575-aca8-41e9-8d01-9039a6b8b48a	4869	4865	chrUn_KI270467v1:676-3919	chr22:11211034-11215498	4578	4702	1	1	0.996921	0.609	0.773713
93582fb6-d024-447f-ac1c-0dd5e9d6d37e	4818	4817	chrUn_KI270467v1:672-3919	chr22:11211032-11215424	4445	4707	1	19	0.99917	0.630371	0.774166
93e74d63-44e8-4b47-baa1-4dd2bd6c57a0	21720	21722	chrUn_GL000216v2:144757-155061	chrUn_GL000216v2:149752-157524	10772	8307	1	1	0.996919	0.644913	0.785001
946c91b8-ad8e-44ac-9097-6bdbaff0fb84	18939	18939	chr22:11211034-11215498	chr22:11211034-11215498	6481	5355	12	1	0.99789	0.57846	0.694491
95aff8ca-aa1f-47d9-b17b-58b17fb7fc9e	4437	4438	chr13:18211865-18213833	chr22_KI270734v1_random:119039-122097	3152	3299	6	0	0.977186	0.553617	0.788118
9b13d77c-ab53-4cdd-8402-137f52a8f7c4	2126	2130	chr22:21326163-21327967	chr13:18211700-18212563	1936	873	1	22	0.997183	0.771178	0.892325
a1ead4b0-a227-4250-8b7d-8b633d664fa2	5321	5325	chrUn_KI270467v1:700-3918	chr22:11211032-11215498	5057	5095	1	1	0.998686	0.546767	0.724632
b119d496-0514-4c22-803a-f7d02e67bed8	749	748	chr22_KI270734v1_random:121035-121638	chr22:18238235-18238341	635	106	12	0	0.998665	0.792126	0.943396
b1f93645-bb90-44b1-b95c-38073f3f5071	11164	11163	chr22:11211034-11215496	chr22:11211034-11215486	6429	5302	9	1	0.999463	0.582672	0.698793
b2911e90-c614-4c8c-90be-87359c0d4883	5131	5133	chrUn_KI270467v1:658-3917	chr22:11211032-11215493	4866	4739	1	34	0.999414	0.574805	0.771049
b30d249c-4d4f-4bed-916d-2141619862f6	5201	5194	chrUn_KI270467v1:672-3917	chrUn_KI270467v1:672-3918	4455	3745	1	1	0.998071	0.627385	0.740988
b3adf141-b5d0-4cf0-be01-bfd13dc76c6b	8370	8372	chr1:143215747-143228521	chr1:143213972-143223344	12779	9377	5	18	0.999522	0.607012	0.827663
b83fc3c3-2b16-4ce4-b960-8926ec1fe33d	9895	9895	chr13:18211700-18215461	chr22:18417186-18421872	5691	4951	48	1	0.99435	0.575119	0.768734
bb1f93de-8461-4794-9df0-3fa426d48678	9821	9820	chr22:18890485-18896313	chr22_KI270734v1_random:118542-122262	7451	4030	25	1	0.998982	0.673735	0.780893
bb4db63b-e835-4f9b-9e54-c8c24846baf2	11183	11209	chr22:18417157-18421872	chr3:183905837-183907392	4980	1595	26	60	0.972328	0.747791	0.942947
be265af6-4d7e-4755-acfe-409f0a75fe12	5120	5120	chrUn_KI270467v1:665-3905	chr22:11211032-11215498	4140	4737	1	38	0.992594	0.667633	0.769052
c1004760-c768-49b0-87da-4e066e8060a5	5090	5092	chrUn_KI270467v1:684-3918	chr22:11211033-11215498	4580	4561	1	3	0.996269	0.605677	0.778996
c5cb9f26-7177-43e4-b1eb-3ca5f6ef9720	4298	4292	chr13:18211775-18214741	chr22:18893237-18896917	4276	3991	1	1	0.997209	0.590739	0.771987
d72f4b24-fe33-4a97-9ab7-b90c9ae0eeaa	9655	9658	chr20:30401488-30412331	chr22:10928955-10937176	12250	9675	1	1	0.998137	0.636571	0.802894
d7a6ec85-d75c-45ce-a3a8-edf09af27ab4	4530	4531	chrUn_KI270467v1:659-3705	chr22:11211034-11215486	4199	4513	1	12	0.999779	0.624911	0.759805
dabd16d4-17c0-45df-95f8-731d4965579b	3604	3602	chr14:19713648-19715947	chr22:15526467-15528426	2304	1965	6	0	0.975717	0.832899	0.974555
dd5295a3-43d4-47fc-b0a0-8504a3c321e8	1337	1338	chr22:21326328-21327559	chr13:18211719-18212267	1315	548	1	60	0.972552	0.78403	0.89781
e02a6014-462a-4dbf-8e8b-2fd8f4d5de36	5428	5423	chrUn_KI270467v1:672-3882	chr22:11211032-11215497	4523	4921	1	2	0.999263	0.600707	0.747003
e090f362-e3bc-4f00-b423-2499574ce11f	7813	7813	chr22:18890485-18896608	chr22:18893793-18896990	7719	3399	37	1	0.996931	0.684804	0.788761
e88a6495-b803-413e-9800-14df0c2d721a	20865	20863	chr20:30842330-30855065	chr22:11550626-11561052	12785	10494	1	24	0.997558	0.771216	0.935963
ec1eeb17-2837-4c93-9fb1-926451f10f37	3673	3674	chr22:23949571-23950867	chr22:23939048-23939931	1331	884	1	60	0.990771	0.821938	0.964932
eee0dc00-1ab1-41e8-a010-583e1ca44875	15068	15039	chr22:16504089-16519802	chr16_KI270728v1_random:1856023-1868721	15864	12844	1	1	0.986112	0.755295	0.93024
f750fd9b-c59e-4caf-80e7-93f799662436	1811	1806	chr22:18732761-18734157	chr13:86061523-86061820	1463	300	1	60	0.962842	0.715653	0.826667
fd70983c-0100-4263-9b2e-901bd7fb8c49	3656	3671	chr22:29051557-29054693	chr22:29052611-29054693	3186	2091	60	60	0.977748	0.844633	0.986609
